# Supplementary material
Source: Springer Nature journal article supplement (https://www.springermedizin.de/resource/supplementary/13058_2010_2537_MOESM5_ESM.pdf/9701644)

**(a)**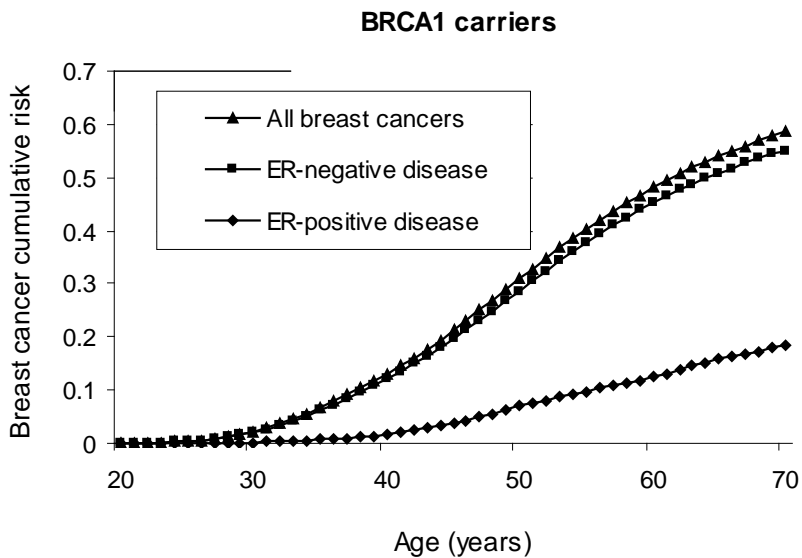**(b)**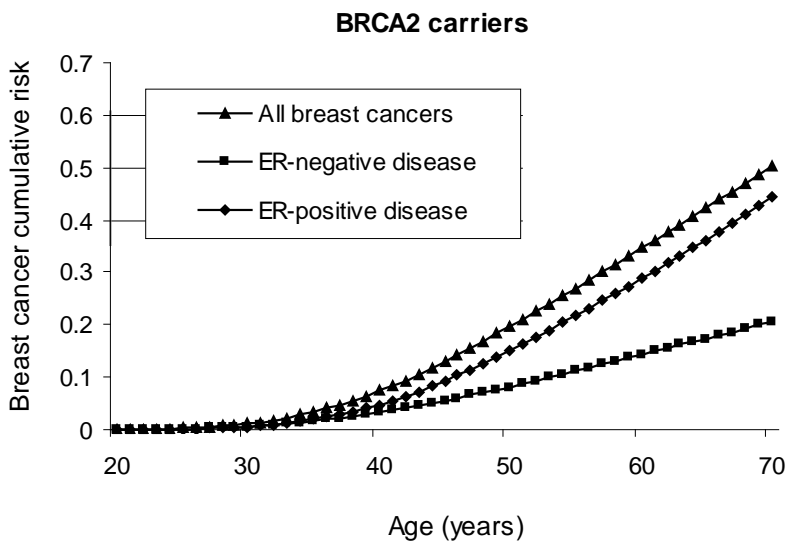**(c)**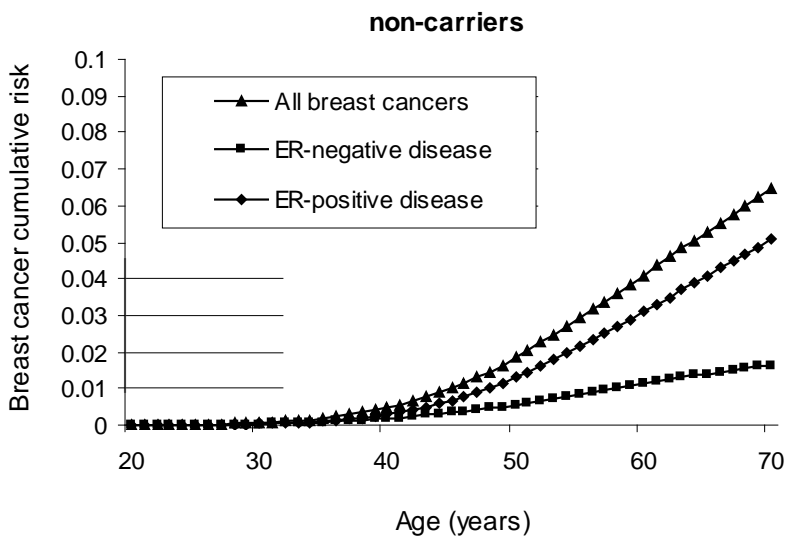

Supplement: MOESM5 [file 9701644]
